# Supplementary material
Source: Springer Nature journal article supplement (https://www.springermedizin.de/resource/supplementary/13613_2012_111_MOESM1_ESM.pdf/12196174)

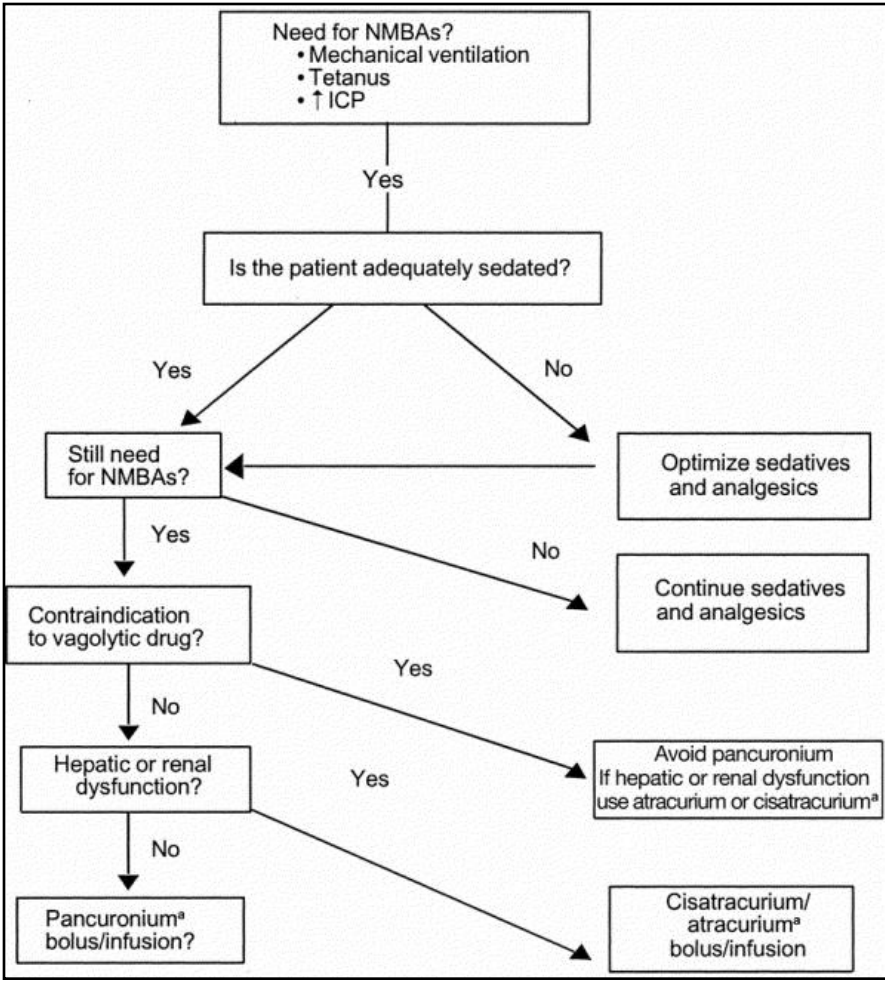

Supplement: MOESM1 [file 12196174]
